# Supplementary material for: Parallel Evolution of Tetrodotoxin Resistance in Three Voltage-Gated Sodium Channel Genes in the Garter Snake Thamnophis sirtalis
Source: PubMed Central journal article supplement — Mol Biol Evol. 2014 Aug 18;31(11):2836–46. doi: 10.1093/molbev/msu237 (PMC4209135; doi:10.1093/molbev/msu237), 2014-08-18
Supplement: supp_msu237_msu237-Supplementary_Material.pdf [file supp_msu237_msu237-Supplementary_Material.pdf]

## Supplementary Material

**Table S1.** Amino acid sequences of six voltage-gated sodium channels from *Th. sirtalis*. When two copies of exon 5 are present (fig. 1), exon 5a, which varies in sequence across paralogs, is shown.

### Na<sub>v</sub>1.1 (partial amino acid sequence, GenBank accession BK008860)

MEQPVLVPPGPDSEFHYFTRESLAAIEQRIAAEKAKQSKQDHDNDENGPKPSSDLEAGKSLPFIYGDIPA  
GMVATPLEDLDPFYINTKTFIVLNRGKAIFRFSATPALYILTPFNPLRKVAIKILVHSLFSMLIMCTILT  
NCVFMTLNPPDWTKNVEYFTFTGIYTFESLIKI IARGFCIDGFTFLRDPWNWLDFTVITFAYITFVNLG  
NVSALRTRFRVLRALKTISVIPGLKTIVGALIQSVKLSVDMILTVFCLSVFALIGLQFLMGNLRHKCLYW  
NPPNATDNDTDIFNATFGENSTLNATQFDWNAYIQDENNFYFLEGQNDALLCGNSSDAGQCPEGYFCIKA  
GRNPNYDYTSFDTFSWAFLSLFRMLTQDFWENLYQLTLRAAGKTYMIFVFLVIFLGSFYLINLILAVVAM  
AYDEQNQATMEEADHKEAEFQQMLEQLKKHQEGVQAAAIAAATASAESNDPSVRGGTGGHSESSSETS  
SSKSAKERNRNRKRKQKEQCGGEEKDEDEFHRSESEESFRRKGCRRFSIEGNRLTLERKHSSPHQSLLSM  
RGSLSFSPRRNSRTSLFSFRGRAKDIGSENDFADDEHSTFEDNDSRRDSLFPVRRHGERRNSNISQASRSS  
RMLAVFPVNGKMHSTVDCNGVVSLVGGPSVPTSPVGQLLPEVI IDKPATDDNATTTETELKKRRSSSFHI  
SMDFLEDPNLRDRAMSVASILTNTMEELEESRQKCPPCWYKFANIFLIWDCCPHWLKI KHVVNI IVMDFP  
VDLAIITICIVLNTLFMAMEHYPMTERFAEVLNVGNLVFTGIFTGEMFLKLVAKDPYFFFQEGWNIFDGF I  
VTLSLVELGLANVEGLSVLRSFRLLRVFKLAKSWPTLNMLIKI IGNSVGALGNLTLVLAII VF IFAVVG  
QLFGKSYKECVCKIAKDCELPRWHMDFHFSFLIVFRVLCGEWIETMWDCMEVAGQAMCLTVFMMVMVIG  
NLVVLNLF LALLLSSFSADNLAATDDDNE MNNLQI AMARIDK GIDFMKRKMHEF IQKSFVKKQKALDETK  
PLEELHNKNTCISNHTIEICKEIDYFRDRNGTTTSGIGTGSSVGGKYVVDSESDYMSFINNPSLTVTVPIAV  
GESDFENLNTEEFSSSESDSEESKEKLNSSSSSEGSTVDIGLPAEEQAVVEPEEAELEPEACFTEGCVQRFK  
CCQVSVEDGRGKQWWSLRKTCFRIVEHNWFETFIVFMILLSSGALAFEDIYIEQRKTIKTMLEYADKVFT  
YIFILEMLLKWVAYGYQTYFTNAWCWLDFLIVDVSLISLTANALGYSELGAIKSLRTRLRALRPLRALS  
EGMRVVNALLGAIPSIMNVLLVCLIFWLIFSIMGVNLFAGKFYHCVNTTTGNMFEVDEVANKSECESLI  
LANETARWKNVKVNFNDVGFYLSLLQVATFKGWMIMYAAVDSRQVLEQPIYEDNLYMYIYFVIFIFG  
SFFTLLNLFIGVIIDNFNQKKKFGGQDIFMTEEQKKYYNAMKKLGSKKPKQPIPRPGNKYQGMVDFVFTQ  
QVFDISIMILICLNMITMMVETDDQSKQTEDILYRINFIFIVLFTGECVLKLI SLRYYYFTIGWNIFDFV  
VVILSIVGMFLAEIEKYFVSPTLFRVIRLARIGRILRLIKGAKGIRTL LFALMMSLPALFNIGLLLFLV  
MFIYAFGMSNFAYVKREVGIDDMFNFTFGNSMICLFMITTSAGWDGLLAPILNSGPPDCDPKDHGPGS  
SVKGDCGNPSVGIFFVSYIIISFLVVNMYIAVILENFGVATEESAEPLESDDFEMFYEVWEKFDPDAT  
QFMFEKLESEFAAALEPPLHLPKPNKV

### Na<sub>v</sub>1.2 (partial amino acid sequence, GenBank accession BK008861)

MAQSVLVPPGPDSEFNFTKESLAAIEQRIAAEKAKKSKQERKDVDDENGPKPNSDLEAGKSLPFIYGDI  
PPGMVSEPLEDLDPYYVNKKTIVLNRGKAIFRFSATS AVYLLTPFNPLRKIAIKILVHSLFSMLIMCTI  
LTNCVFM TMSNPPEWTKNVEYFTFTGIYTFESLIKILARGFCLENFTFLRDPWNWLDFTVITFAYVTEFVN  
LGNVSALRTRFRVLRALKTISVIPGLKTIVGALIQSVKLSVDMILTVFCLSVFALIGLQFLMGNLRHKCL  
LWPPDNSTY TINVVS YFNSSMGENGTFVNTTVTTFNWEYVRRDSSH FYFLEGQNDALLCGNGSDAGQCPE  
GYMCVKAGRNPNGYTSFDTFSWAFLSLFRMLTQDFWENLYQLTLRAAGKTYMIFVFLVIFLGSFYLINL  
ILAVVAMAYEEQNQATMEEAEQKEAEFQQMLEQLKKQEEAQAAAALAAAAGESREFSEIGGVGGFSESS  
ATSKLSSKSAKERKNRKRKQREQSEGDEKDDDEFHKSESEDSIRRKGFRFSIEGNRLTYEKRFSSPHQS  
LLSIRGSLFSPRRSSKTSLSFRGRAKDFGSENDFADDEHSTFEDNESRRDSLFPVPHRSERRNSTISQA  
SRSSRVMPILPANGKMHSTVDCNGVVSLVGGPPPLMSPTGQLLPEGTTTETELRKRSSSYHMSMDFLSD  
PTARQRAMSIASILTNTMEELEESRQKCPPCWYKFANMCLIWDCWAPWLKIKHIVNLI VMDPFVDLAIIT  
CIVLNTLFMAMEHYPMTQQFNVL SVGNLVFTGIFTAEMFLKII AKDPYFFFQEGWNIFDGI IVSLSLME  
LGLANVEGLSVLRSFRLLRVFKLAKSWPTLNMLIKI IGNSVGALGNLTLVLAII VF IFAVVG  
MLFGKNYKECVCKISNDCELPRWHMDFHFSFLIVFRVLCGEWIETMWDCMEVAGQPMCLTVFMMVMVIG  
NLVVLNLF LALLLSSFSADNLAATDDDNE MNNLQI AVARIQK GIDFIKKAHEC VEKAFVRKQKALDEIKPLEDLNN  
KKDSCISNHVIVDIAKDFNYLKDGNGTTSIGIGSSVEKYIIDESDYMSFINNPSVTVTVPIAVGESDFENL

Toxin Resistance Evolution in Garter Snakes – Supplementary Material

NTEEFSSSEDL EESKEKLNASSSSSEGSTVDVGLPPIGE QPEAEPEESLEPEACFTEGCIRKFKCCQVSL E  
DGKGLWNNLRKTCYKIVEHNWFET FIVFMILLSSGALAFEDIYIEQRKTIKTVLEYADKVFTYIFILEM  
LLKWVAYGFQVYFTNAWCWLD FLIVDVSIVSLTANALGYSELGAIKSLRTLRLRPLRALS RFEGMRVVV  
NALLGAIP SIMNVLLVCLIFWLIF SIMGVNLFAGK FYHCVNTTTGEMF SIDEVDNQTECENLIERNETAR  
WKNVKVNF DNVGLGYLSLLQVATFKGWMDIMYAAVDSRNVEQQPHYEDNLYMYLYFVIF IIFGSFFTLNL  
FIGVI IDNFNQ QKKKFGGQDIFMTEE QKKYYNAMKKLGSKKPQKPIPRPANKFQGMVDFVTKQAFDISI  
MILICLNMTMMVETDDQTDAMETILYRINFIFIVLFTGECVLK LISLRYYYFTIGWNIFDFV VVILSIV  
GMFLAEIIEKYFVSPTLFRVIRLARIGRILRLIKGAKGIRTL LFFALMMSLPALFNIGLLLFLVMFIYAI F  
GMSNFAYVKREVGIDDMFN FETFGNSMICL FQITTSAGWDGLLAPILNSGPPDCDPEIDHPGSSVKGD CG  
NPSVGIFFFVSYIIISFLV VVNM YIAVILENFSVATEESAEP LSEDDFEMFYEVWEKFD PDATQFIEFAK  
LSDFAASLD PPLLI PKPNKVQLIAMDLP MVSGDR IHCLDILFAFTKRVLGESEMDALRVQMEDRFMAAN  
PSKASYEPITTT LKRKQEEVSAV I I

Na<sub>v</sub>1.3 (complete amino acid sequence, GenBank accession BK008862)

MAQ TLLVPPGPDSFCFF TRESLAAIEKRCTEEKAKR PKQEHTDNDD ESGPKPNSDLEAGKTL PFIYGDIP  
PGMGSEPLEDLDPYYSNKKT FIVLNRGKTIFRFSATSALYILTPFNPLRKIAIKILVHSLFSMLIMCTIL  
TNCVFM TMSNPPEWTKNVEYTF TGIYTFESLIKILARGFCLEGF TFLRDPWNWLD FSVILMAYVTEFVNL  
GNVSALRTFRVLRALKTISVIPGLKTIVGALIQSVK KLSVDMILTVFCLSVFALIGLQLFMGNLRHKCLL  
WPLDNSTLEGNI TSHFNSTEGDNDTFVNMTV TTFNWE EYIEDESHFYVLE GQRDALLCGNSSDAGQCPEG  
YMCVKAGRNP NYGYTSFD TFSWAFLSL FRLMTQDFWENLYQLTLRAAGKTYMIF FVLVIFLGSFYLINLI  
LAVVAMAYEEQNQATMEEAEQKEAEFQQMLEQLKKQ QEEAQTAAVA AASVASRDFSGVGG LGELLE SSS  
EASKLSSKSAKDRNRK RKKKQKELSEAEDKEEAERYPKSESEDSIRRGRLSYEKRTSTHQ SLLSFRGS  
LFSPRNSR TSIFSFRGRVKDIGSEND FADDEHSTLEDNESRRDSL FVPNRQTSERNSTTSQISLSSKM  
VPVLPANGKMHSTVDCNGV VSLMGPPALP SPTGQFLPEGTTTETEIRKRRLSSYQISMELMEESAARQR  
AMSIASILTNTMEELEESRQKCPPCWYRFANVFLI WDCWLPWLKVKHIVN LIVMDPFVDLAITICIVLNT  
LFMAMEHYPM TSDFYQVLSVGNLVFTGIFTAEMILKIIAMDPY YFQEGWNIFDGIIVSLSLMELGLANV  
EGLSVLRSFRLLRVFKLAKSWPTLNMLIKIIGNSVGALGNLTLVLA IIVFIFAVVGMQLFGKSYKECVCK  
IAEDCELPRWHMNDFFHSFLIVFRVLCGEW IETMWDCEVAGQTMCLIVFMLVMVIGNLVVLNLF LALLL  
SSFSSDNLAATDD DNETNNLQIAVARIQKGIDYIKKKLGEIVQKGTVRKQKAIDDIKVLEELNHKKDVCI  
SNHTMAEITKDVNYLRDGN GTTSGLGTGSSVEKYI IDENDYLSFINNPGLTVTVPIAVGESDFENINTEE  
FSSESELEGSKEKINATSSSEGSTVDVALPGEGEQAEIEPEEAELEPEACFTEGC IQKFPCCQVSI EDGKG  
KIWWNFRKTCYCIVEHNWFET FIVFMILLSSGALAFEDIYIEQRKTIKTMLEYSDKVFTYIFILEMLLKW  
VAYGFQIYFTNAWCWLD FLIVDVSIVSLVANALGYSELGAIKSLRTLRLRPLRALS RFEGMRVVVNALV  
GAIP SIMNVLLVCLIFWLIF SIMGVNLFAGK FYHCVNTTTGEMFNI SDVNNKTECDELIHNNQ QARWKNV  
KVNFDNVGAGYLALLQVATFKGWMDIMYAAVDSRDVEEQPYEDNLYMYLYFVIF IIFGSFFTLNLF IG V  
IIDNFNQ QKKKFGGQDIFMTEE QKKYYNAMKKLGSKKPQKPIPRPGNK FQGLVDFVTKQAFDITIMILI  
CLNMVTMMVETDDQSKEMEIILSRINLVF IILFTGECVLK LISLRHY YFTIGWNIFDFV VVILSIVGMFL  
AEIIEKYFVSPTLFRVIRLARIGRILRLIKGAKGIRTL LFFALMMSLPALFNIGLLLFLVMFIYAI FGM SN  
FAYVKREVGIDDLFN FETFGNSMLCL FQITTSAGWDGLLAPILNSGPPDCDPEIDHPGSSVKGD CGNPSV  
GIFFFVSYIIISFLV VVNM YIAVILENFSVATEESAEP LSEDDFEMFYEVWEKFD PDASQFIEYSKLSDF  
AASLD PPLLI AKPNNVQLISMDLP MVSGDR IHCLDILFAFTKRVLGESEEMD LLRVQMEDRFMAANPSKV  
SYEPITTT LKRKQEEVSAV I IQRAFRHFLKQKVKVVTSMYNKEKCRDGEVLP IKDVTSDRFNGNSSPEK  
TNESSSTTSPPSYDSVTKPNKEKYEKGKTERDFKGDIKISKK

Na<sub>v</sub>1.4 (complete amino acid sequence, GenBank accession BK008863)

MAAVPYIPGPDCLRPFTRESLKAIEKRIAEREAELKNQH EEVLD EEKQPKPRCDLEQGKGLPLIYGEPP  
PELIGVPLEDLDFYSDQKTYIILNKGNTIFRFTAAPALYMLDPFNP IRNGAIKVLTHSLFSM FIMITIL  
ANCVFM TMSNPP I WAKDVEYTF TGIYTFEAMIKVLARGFCIDSFTFLRDPWNWLD FSVIVMAYVTEFVDL  
GNVSALRTFRVLRALKTITV I PGLKTIVGALIQSVK KLDVDMILTVFCLAVFALIGLQLFMGNLRQKCVR  
WPPFSNDTLQDALGPSFTSDSLQDVLWRDPLDNSTLNDNFTLTGTFDWHEYIN NEDNFYFLDGALDALLC  
GNSSDAGQCPEGFLCMKAGRNP NYGYTSYDTFSWAFLSL FRLMTQDYWENLFQLTLRAAGKTYMIF FVVI

IFLGSFYLINLILAVVAMAYAEQN DATLQEEKEKEEEFQQMVEQLKKHQEEQQRLLQAQTATNSSAESII  
VEKKQKGELEDEKAQSDQEGPKDCNGRAIPRLV LERSATVRESNPREEHEKSHQNHLVYDGVVEGKLEKRV  
GSAVSVVSSSTLEEELEEAHQKCPPWYKFAHAVLIWNCCPVWVKLKHIIKLIIVLDPFVLDGITICIVLNTV  
FMAMEHYPMTEEFNNVNLVGNLVFTGIFTAEMVLKLI ALDPYEFQIGWNI FDSII VTLSSLVELGLANVQ  
GLSVLRSFRLMRVFKLAKSWPTLNMLIKIIGNSV GALGNLTLVLAIIVFIFAVVGMQLFGKNYIECVCKI  
SSDCELPRWHMHDFHFSFLIVFRILCGEWIETMWD CMEVAGQPMCLIVFLMVMVIGNLVVNLNLF LALLLS  
SFSADSLAGSDDDSEMNNLQIAIGRINRGIDFV KKHVLLLLLHRELKEKTELSSEEPDDSKKENFVLNHMD  
NLNHVD TGQDFKSEYMDGIVKNEQLIDELGQMNF INNPNTLINVPIASEESDLYDETD TGEETADDIKKP  
LSDGTDSSICSTVDYKPPDPSEEKAEVEENMEND DPEECFTEACVQRC PFLYVDIKTEKGAKWWNLKAC  
FKIVEHNWFETFIIFMILLSSGALAFEDIYIERRHTIR TILEYADKIFTYVF ILEM LKWWAYGFKVYFT  
NAWCWLD FLIVDVSLISLTANWLG YSELGAIKSLR TLRALRPLRALS RFEGMRVVVNALLGAIP SIMNVL  
LVCLIFWLIFSIMGVNLFAGKYRCVNTTTGDLFEI EHVNNKSDCINLINIENATDVRVWNVKNVFN DNVG  
LGYLSLLQVATFKGWDIMYAAVDSREQEEQPO YEVNLYMYIYFVIF IIFGSFFT LNLFIGVIIDN FNQQ  
KKKFGGKDI FMTEEQKYYNAMKKLGSKKPKPI PRPQNKYQGMIFDFV TQQAFDIIIMILICLNMV TMM  
VETDDQSQT KITILAQINLVFIIIFTSECF LKMIALRHYFFTNGWNIFDFV VVILSIVGLVLSDIEKYF  
VSPTLFRVIRLARIGRVLRLIRGAKGIR TLLFALMMSLPALFN IGLLLFLVMFIYSIFGMSNFAYVKES  
GIDDIFNFETFGNSIICLFEVTTSAAWDGLLNP ILNSVPPDCD PHLDNPGSHVKGDCGNPSM GICFFCSY  
IIVSFLIVVNM YIAIILENFVATEESSEPLCEDDFEMFYETWEKFDPDATQF IAYSTLSDFVDTLQEPL  
RIAKPNKIKLITL DLPMPGDKIHCLDILFALTKEVLGDSGEMDALKQSMEEKFMAANPSKVS YEPITTT  
LKRKQEEVCAIKIQRAFRRYLLKRSVKQASYLYRQS QMDIPKENAPEKEGMIANKMNAMYSSQVEVEKS  
PETAPSPVLEPLSSPEIKKDAGEMKEQDNNGKEGDDSGKTKKSENAKRGVKESSV

**Na<sub>v</sub>1.6 (complete amino acid sequence, GenBank accession BK008864)**

MAGRLLAPPGPDSFRPFTPELANIEKRIAEDKKKRPKQDSSHRDDEDNKPKPNSDLEAGKSLPFIYGD  
IPKGLVAVPLEDFDPYMTQKTFVVLNRGKTLFRFSATPALYILSPFNLLRRIAIIKILIHVSFVSMIIMCT  
ILTNCVFMFTFSNPPEWSKQVEYTFGTGIYTFESLVKIIARGFCIDGFTFLRD AWWLDFSVIMMAYITEFV  
NLGNVSALRTFRVLRLAKTISVIPGLKTIVGALVQSVK KLSVMI LTVFCLSVFALIGLQLFMGNLRNKC  
VVWPIDLNETYLENGTKGFDWEEYSNNMSNFYTI PGFLDPLL CGNSSDAGQCPEGYTCMKAGRPNPYGYT  
SFDTFSWAFLALFRLMTQDFWENLYQLTLRAAGKTYMIF FVLVIFVGSFYLVNLI LAVVAMAYEEQNQAT  
LEEAEQKEAEFKAMLEQLKKQEEAQAAMATSAGTVSDDAAEEGGGGRMSHTSSEFSKLSKSAKERN  
RRKKRKEKELSEGEEKGDLEKVFKSESEDMRRKVFRLPDNRLGRKLSIMNQSLLSIPGSPYLSRHNSKS  
SIFSFKRGRDPGSENEFADDEHSTVEESEGRRDSLFIPIRGYDRKSSYSGYSGYSQGRSSRIIFPSIRR  
NMKRNSTVDCNGVVSLIGGPTSNIIPSGRLLPEVKIDKAATDDSATTEVEIKKKSTGSLLVSM DQLNASYG  
RKDR TNSIMTVITNTLVEELEESQRKCPPC WYKFANTFLIWECHPHWVKLKEIVNLIVMDPFDLAITIC  
IVLNTL FMAMEHHPMPPTFEHVLA VGNLVFTGIFTAEMFLKLIAMDPY YFFQEGWNI FDGFIVSLSLLEL  
MLADVEGLSVLRSFRLLRVFKLAKSWPTLNMLIKIIGNSV GALGNLTLVLAIIVFIFAVVGMQLFGKNYK  
ECVCKINPDCDLPRWHMHDFHFSFLIVFRVLCGEWIETMWD CMEVAGQAMCLIVFMMVMVIGNLVVNLNLF  
LALLLSSFSADNLAASDDD GEMNNLQISVIRIKKGI AWIKIKVHEFVQTHFKQREADEVKPLDELYDKKM  
NCIANHTGADINREIDYQKNGNGT TSGIGSSVEKYIIDEDHMSF INNPHTVVRVPIAVGESDFENLNTED  
FSSDTDAGGSKEKLD DTSSEGSTIDIKPEVEEVPVEAPEEYLDPDACFTEGCVQRFKICQVSI EDGLGK  
SWWNLRKT CFLIVEHNWFETFIIFMILLSSGALAFEDIYIEQRKTIRTVLEYADKVF TYIFILEM LKWC  
AYGFVKFFTNAWCWLD FLIVAVSLVSLIANALGYSELGAIKSLR TLRALRPLRALS RFEGMRVVVNALVG  
AIPSIMNVLLVCLIFWLIFSIMGVNLFAGKYHYCFNETAEYRFEIEEVNNKTECEKLM DPNGTEIRWKNV  
KINF DNVGAGYLALLQIATFKGWDIMYAAVDSRKQEEQPKYEDNIYMYIYFVIF IIFGSFFT LNLFIGV  
IIDN FNQQKKKFGGQDIFMTEEQKYYNAMKKLGSKKPKPI PRPLNRIQGAVDFV TQQAFDIVIMLLI  
CLNMV TMMVETDTQSKQMEEILYWINFVFIIFTCECVLKM FALRHYYFTIGWNI FDFV VVILSVVGMFL  
AEIIEKYFVSPTLFRVIRLARIGRILRLIKGAKGIR TLLFALMMSLPALFN IGLLLFLVMFIYSIFGMSN  
FAYVKHEAGIDDMFN FETFGNSMICLFQVTT SAGWDGLLLPILNRPPDCDLEKEHPGSGFKGDCGNPSVG  
IFFFVSYIIISFLIVVNM YIAIILENFVATEESADPLSEDDFET FYEIEWEKFDPDATQFIEYCKLADFA  
DALEHPLRVPKNTIELIAMDLPMVSGDRIHCLDILFAFTKRVLGD SGELDILRQQMEERFVASNPSKVS

YEPITTTLRKQEEVSAVVIQRAYRVRLARRGFI CRKNVSNAIENGGTNREKKEGTPSTASLPSYDSVTK  
PEKEKQRAEEGRERAKRQKDARESKC

**Na<sub>v</sub>1.7 (complete amino acid sequence, GenBank accession BK008865)**

MAHALHAQPGPDCFFQFTQESLAAIEQRITEEKAKQKVEQEKEEDHDESKPKPNTDLEAGKSLPFIYGD  
IPSRFVSQPLEDLDPYYANKKTFIVLNKGKTI FRFSATPALYMLSPFSTLRRISIKILVHSLFSIFIMFT  
ILTNCVFMTLKDPPKWSWMVEYFTFTGIYTFESLIKIFARGFCIDKFTFLRDPWNWLDLFLVISFAYITEFV  
KLGNVSALRTFRVLRAKTI SVIPGLKTI VGALIQSVKLSVDMILTLFCLSVFALIGLQLFMGHLRHKC  
LYWPNNTSPEDPRFKEYYNGTELLWSKYMENKDHFYYLEGAKDALCGNSSDAGQCPEGYICVPYGRNPD  
YGYTSFDSFSWAFSLFRLMTQDYWENLYQOTLRAAGKGYMFFFVVVIFLGSFYLINLILAVVAMAYDEQ  
NQATIEEALRKETEYQQMLEHLKRQQEEAQAALMAAAAYKDFRDDGTLGRLSETSSSELSSSKSAKERRNR  
KKRRQRELSVGEPPGGNNKMFPKSESDSSIRRKGF RF SLEGNRLAYESRVISPYQSILFPTRSNSRASFS  
FKSPTVEGGSDADSEHSTFEENSRNGSYFVVRSHSERRSSNISQTMFPMNGKMQSSVDCNGVVSLVGGP  
PVLLSPTGQLLPEVIDKATDDSP T T SEMENKKRQSSSFQISMDLLEDPTIRERAMSIASII TNTMEEL  
EESRQKCPPCWYKFAHKYLIWNCSDRWLQIKKIIHLIVMDPFVDLGITICII LNTLFMSMEHYPI DDFS  
SILKNGNLVFTGIFTAEMVLKIVAMPYFFYQEGWNI FDSII VTL SLMELGLQNV EGLSVLRSFRLLRVF  
KLA KSWPTLNMLIKI IGNSVGALGNLTLVLAII VFI FAVVGMQLFGKNYDMCKCKISEDCTLPRWHMND  
FHSFLIVFRVLCGEWIE TMWDCMEVSGQPLCLTVFMMVMVIGNLVLLNLF LALLLSSFS SDSLAAPEQET  
EANNLQIAISRIQRGINYIKRKICEFVQIVFLQRCKATSGLSAADQ QNDKEDQCIPNHTIVEINQTFGYQ  
RPRMTTSCVDNTD HMSFINNPNLTVTVPIAVGESDFEHFNTEELTSISEVEETKEKTS LCSSTEGSTII F  
ASVGDKESDAAAKGPPQPKPCFTDGC VQKFKCCQIDIESGKGCW WNL RKT CFKIVEHNWFETFIVFMIL  
LSSGALAFEDIYIEQRKTIKTVLEYADKVFTYIFILEMLLKWVAYGFQAYFTNAWCWLD FVIVDVSLVSL  
IANALDYSELGPIKSLRTRLRALRPLRALS RFEGMRVVVNALVGAIP SIMNVLLVCLIFWLIFSIMGVNL  
AGTFFECVNKTDGVRISHLIVPFKNVCETLDYARWRNVKVNFDNVAAGYLSLLQVATFKGWMEIMYAAVD  
STGIEEQPQYEHNL MYLYFVGF IIFGSFFTLNLF IGVIIDNFNQQKKLGGQDIFMTEEQKKYINAMKK  
LGSKKPQKPIPRPSNKIQGFVDFVTKQAFDIGIMILICLNMITMMVETADQDTSVEDILYWINLIFIVL  
FTA ECLLKLIALRYYYFTIGWNIFDFVVVIFSI VGMCLSKII EKFFVSPTLFRVVRLARIGRILRLIKGA  
KGIRTL LFALMMSLPALFNIGLLLFV MF IY AIFGMSQFAYVKREAGIDDMFN FET FANSMICLFQITTS  
GGWNYLLYPSLNKEPDCDPK K VHPGSSVLGDCGNPSVGIFFFVSYIIISFLVVVNMYIAVILENFSVATE  
ESA EPLGEDDFEMFYEVWEKFDPGATQFIELSKLFDFAASLEPPLLI PKPNKVQLIAMDLPIVSGDRIHC  
LDILFAF TKRVLGESDEMDSL RVQMEDRFMAANPSKVS YEPITTTTLKRKLEEQSARVIQRAFRHYLRKP  
VCNTDVQYLNRNIFPCKAEMEFDKFSLSLTLEKTERSSTTSPPSYDSVTKPKDYEQEKSEKEEK GKDDK  
DYRK

**Table S2.** Overgos used in BAC library scan. Overgos were combined into one pool for the first scan and pooled as indicated below for the second scan.

| Pool | Name           | Expected paralog | Forward overgo            | Reverse overgo            | Source |
|------|----------------|------------------|---------------------------|---------------------------|--------|
| 1    | 78842          | SCN1/2/3/9A      | TGCCTTAATATGGTCACCATGATG  | GGTCATCTGTTTCAACCATCATGG  | 1      |
| 1    | 34924B         | SCN1/2/3/9A      | CCAACACCAGGCATTTGTGAAATA  | CTATGGCTTCCAGATTTATTTTAC  | 1      |
| 2    | UProbe1799     | SCN1/2/3/9A      | GGCCAAACCATGTGCCTTATTG    | GACCAGCATGAAAACAATAAGG    | 2      |
| 3    | SCNAu1         | SCN1/2/3/9A      | AATGGTGTCTGAGCCATTGGAGGA  | GTAATATGGGTCCAGGTCCTCCAA  | 3      |
| 3    | SCNAu2         | SCN1/2/3/9A      | ACTTTCCTCCGGGATCCCTGGAAT  | CTGTGAAGTCCAACCAATTCCAGG  | 3      |
| 3    | SCNAu3         | SCN1/2/3/9A      | TGATACCTTCAGCTGGGCCTTCTT  | CAGCCGAAATAGTGACAAGAAGGC  | 3      |
| 4    | SCNAu5         | SCN1/2/3/9A      | AAACGAGCCTCTTCAGCTTCAGAG  | AAATCCTTTGCTCGGCCTCTGAAG  | 3      |
| 4    | SCNAu8         | SCN1/2/3/9A      | TGGGATTGTATGGAGGTTGCTGGA  | TAAGGCACATGGGTTGTCCAGCAA  | 3      |
| 4    | SCNAu9         | SCN1/2/3/9A      | ACCCAAGTGTAACCTGTGACAGTAC | TCTCCAACAGCAATGGGTACTGTC  | 3      |
| 5    | 70621B         | SCN1/2/3/9A      | CAGACTGAATGAGAGCTCCACAA   | CCAGGTCTGAAGACAATTGTGGGA  | 1      |
| 5    | UProbe1763     | SCN1/2/3/9A      | TCCTGGTTGGTCAAGCTGTGAA    | AAGATGCAGGAGCATTACAGC     | 2      |
| 6    | 75835          | SCN1/2/3/9A      | GATAAGTTTACTTTCCTTCGAGAT  | CAAGCCAATTCCAAGGATCTCGAA  | 1      |
| 7    | UProbe1757     | SCN1/2/3/9A      | CTAGGTGGTTGTGAATGCTCTT    | GGGATTGCTCCAGTAAGAGCAT    | 2      |
| 8    | UProbe1760     | SCN1/2/3/9A      | GTCTAGGTCAAGTGTAGGAGAG    | CAGGCCAGCAGTGTCTCTCCTA    | 2      |
| 9    | SCN4A1         | SCN4A            | ATTCCTGCGAGATCCTTGGAATTG  | GACACTGAAATCCAGCCAATTCCA  | 4      |
| 9    | SCN4A2         | SCN4A            | CAGTGTCCAGAAGGATTTCTCTGC  | TTCGGCCAGCTTTCATGCAGAGAA  | 4      |
| 9    | SCN4A3         | SCN4A            | CTCTGTGGAGAATGGATTGAGACC  | CCATGCAATCCCACATGGTCTCAA  | 4      |
| 10   | SCN4A4         | SCN4A            | GGTAACAATGATGGTGAAACAGA   | GGTTTGGCTTTGGTCATCTGTTT   | 4      |
| 10   | SCN4A5         | SCN4A            | CTTTGTATCGCCACTCTCTTCAG   | AGCCAATCGGATGACTCTGAAGAG  | 4      |
| 11   | 15010          | SCN5/10/11A      | GATGACACCAATGAAAAGATTCAA  | CGGTTCTTTCTTCACTTTGAATCT  | 1      |
| 11   | 49514          | SCN5/10/11A      | GGATCGACGACATGTTCAACTTCG  | CTGTTGGCAAACGTCTCGAAGTTG  | 1      |
| 11   | 64787          | SCN5/10/11A      | GGCATCCATTTCTCCAGATTCTCC  | CACCAAAGGGTTCTGGGAGAATC   | 1      |
| 12   | 42679          | SCN5/10/11A      | CACCAAGCATTGGTGAAGTACTTC  | TGCCTACGGCTTTAAGAAGTACT   | 1      |
| 13   | 20183          | SCN5/10/11A      | GACACACTTGTTCTGAGGTTACC   | ACTCCAGCTGTTTCATGGGTAACCT | 1      |
| 14   | 72073          | SCN5/10/11A      | CAGAAAAATCCAGCCAATTCCAGG  | ACTTTCCTTCGAGACCCCTGGAAT  | 1      |
| 15   | 72073B         | SCN5/10/11A      | GGAGTGGCACTAAATCGAAAGATC  | TGAACAAAGGGAAGACGATCTTTC  | 1      |
| 16   | 31048          | SCN5/10/11A      | CAGCACTCTCCAACCTTTGCAGATG | AAAGGTTCTTCCAGGGCATCTGCA  | 1      |
| 17   | 24584          | SCN8A            | CATCTTCACTCAGTGGATCAGCAC  | GTGGCTACAGAGGAAAGTGCTGAT  | 1      |
| 17   | FT7MHCY03GU400 | SCN8A            | CAGTAGAGGATCTCCTCCATCTGT  | CCGACACACAAAGCAAACAGATGG  | 1      |
| 18   | UProbe1797     | SCN8A            | TGGAAGTGGCTTGACTTCAGTG    | CGCCATTAGAATGACACTGAAG    | 2      |
| 18   | UProbe659      | SCN8A            | GCAGGTGTGGCACTAAATCGGA    | AGGGAAAACACTCTTCCGATTT    | 2      |

Sources: 1. *Th. elegans* transcriptome (Schwartz et al. 2010) 2. UProbe (Kellner et al. 2005; <http://uprobe.genetics.emory.edu>, last accessed April 2, 2014) 3. Unknown *SCNA* paralog identified in *Th. sirtalis* (Chuckalovcak 2010) 4. *Th. sirtalis* *SCN4A* (Geffeney et al. 2005)

**Table S3.** Putative positive clones identified from BAC library scanning and pooled for 454 sequencing. Clones marked with an asterisk were identified by Chuckalovcak (unpublished data) using *SCN4A*-specific probes.

| Plate | Column | Row |
|-------|--------|-----|
| 2     | M      | 7   |
| 2     | N      | 7   |
| 4     | C      | 17  |
| 7     | B      | 13* |
| 7     | B      | 14  |
| 7     | H      | 23* |
| 13    | N      | 15  |
| 15    | C      | 14  |
| 15    | C      | 15  |
| 16    | G      | 15  |
| 16    | H      | 16  |
| 16    | O      | 15  |
| 19    | N      | 15  |
| 22    | H      | 1*  |
| 26    | C      | 16* |
| 27    | D      | 22* |
| 28    | K      | 3*  |
| 29    | K      | 24  |
| 39    | D      | 7   |
| 39    | E      | 7   |
| 47    | H      | 18* |
| 54    | E      | 16* |
| 75    | G      | 4   |
| 77    | E      | 8   |
| 80    | F      | 20  |
| 80    | G      | 19  |
| 97    | J      | 4   |
| 107   | E      | 10  |
| 109   | E      | 5   |
| 112   | E      | 5   |
| 114   | E      | 14  |
| 115   | E      | 5   |
| 130   | K      | 3   |
| 130   | N      | 18  |
| 130   | N      | 19  |
| 133   | M      | 17  |
| 133   | O      | 18  |
| 133   | P      | 17  |
| 137   | C      | 6   |
| 145   | I      | 2*  |

**Table S4.** Results of BLAT searches of full coding sequences of SCNA paralogs against the *Anolis carolinensis* genome. Searches using individual 454 contigs (including noncoding regions) provided consistent results.

| <i>Thamnophis</i><br>paralog | Score       | Start      | End         | Identity      | Chromosome         | Strand   | Start           | End             | Span         | <i>Anolis</i><br>paralog |
|------------------------------|-------------|------------|-------------|---------------|--------------------|----------|-----------------|-----------------|--------------|--------------------------|
| <b>SCN1A</b>                 | <b>3600</b> | <b>265</b> | <b>5426</b> | <b>91.10%</b> | <b>Un_GL343214</b> | <b>+</b> | <b>989871</b>   | <b>1053318</b>  | <b>63448</b> | <b>SCN1A</b>             |
| (Na <sub>v</sub> 1.1)        | 2414        | 145        | 5357        | 87.50%        | Un_GL343214        | -        | 1335760         | 1409172         | 73413        | SCN2A                    |
|                              | 2310        | 14         | 5357        | 87.20%        | Un_GL343214        | +        | 1520485         | 1608646         | 88162        | SCN3A                    |
|                              | 1193        | 603        | 5357        | 84.90%        | Un_GL343214        | +        | 798646          | 866464          | 67819        | SCN9A                    |
| <b>SCN2A</b>                 | <b>4073</b> | <b>1</b>   | <b>5648</b> | <b>89.80%</b> | <b>Un_GL343214</b> | <b>-</b> | <b>1335448</b>  | <b>1409322</b>  | <b>73875</b> | <b>SCN2A</b>             |
| (Na <sub>v</sub> 1.2)        | 2743        | 14         | 5633        | 87.30%        | Un_GL343214        | +        | 1520485         | 1608943         | 88459        | SCN3A                    |
|                              | 2467        | 274        | 5356        | 87.10%        | Un_GL343214        | +        | 989874          | 1053269         | 63396        | SCN1A                    |
|                              | 1750        | 609        | 5627        | 84.50%        | Un_GL343214        | +        | 798646          | 866755          | 68110        | SCN9A                    |
| <b>SCN3A</b>                 | <b>4083</b> | <b>14</b>  | <b>5925</b> | <b>88.10%</b> | <b>Un_GL343214</b> | <b>+</b> | <b>1520485</b>  | <b>1609235</b>  | <b>88751</b> | <b>SCN3A</b>             |
| (Na <sub>v</sub> 1.3)        | 2794        | 280        | 5905        | 87.40%        | Un_GL343214        | -        | 1335188         | 1401072         | 65885        | SCN2A                    |
|                              | 1920        | 280        | 5581        | 87.20%        | Un_GL343214        | +        | 989883          | 1053494         | 63612        | SCN1A                    |
|                              | 1293        | 606        | 5607        | 85.50%        | Un_GL343214        | +        | 798646          | 866732          | 68087        | SCN9A                    |
| <b>SCN4A</b>                 | <b>2985</b> | <b>391</b> | <b>5622</b> | <b>86.50%</b> | <b>6</b>           | <b>-</b> | <b>63466916</b> | <b>63528585</b> | <b>61670</b> | <b>SCN4A</b>             |
| (Na <sub>v</sub> 1.4)        | 926         | 709        | 5234        | 81.00%        | 2                  | +        | 90897993        | 90950691        | 52699        | SCN8A                    |
|                              | 733         | 1177       | 4883        | 82.30%        | Un_GL343214        | -        | 1335853         | 1382727         | 46875        | SCN2A                    |
|                              | 587         | 2203       | 4976        | 81.00%        | Un_GL343214        | +        | 1022972         | 1053249         | 30278        | SCN1A                    |
| <b>SCN8A</b>                 | <b>4553</b> | <b>1</b>   | <b>5959</b> | <b>90.50%</b> | <b>2</b>           | <b>+</b> | <b>90865054</b> | <b>90950972</b> | <b>85919</b> | <b>SCN8A</b>             |
| (Na <sub>v</sub> 1.6)        | 1116        | 612        | 5666        | 81.60%        | Un_GL343214        | +        | 798646          | 1608892         | 810247       | SCN1/9A                  |
|                              | 694         | 1136       | 5587        | 81.30%        | 6                  | -        | 63466936        | 63519746        | 52811        | SCN4A                    |
|                              | 653         | 612        | 5345        | 82.70%        | Un_GL343214        | -        | 1335835         | 1392932         | 57098        | SCN2A                    |
| <b>SCN9A</b>                 | <b>2996</b> | <b>157</b> | <b>5781</b> | <b>84.90%</b> | <b>Un_GL343214</b> | <b>+</b> | <b>790114</b>   | <b>867023</b>   | <b>76910</b> | <b>SCN9A</b>             |
| (Na <sub>v</sub> 1.7)        | 1621        | 274        | 5775        | 85.30%        | Un_GL343214        | -        | 1335189         | 1401084         | 65896        | SCN2A                    |
|                              | 1475        | 612        | 5405        | 84.30%        | Un_GL343214        | +        | 1000209         | 1053429         | 53221        | SCN1A                    |
|                              | 1264        | 612        | 5451        | 85.80%        | Un_GL343214        | +        | 1531270         | 1608872         | 77603        | SCN3A                    |

**Table S5.** Primer pairs used on *Th. sirtalis* cDNA for filling gaps in SCN1A-3A CDS.

| Name        | Paralog | Forward primer             | Reverse primer              |
|-------------|---------|----------------------------|-----------------------------|
| SCN1A01     | SCN1A   | CTCCGTTGGAAACTTGGTGT       | TGACCTGCAACCTCCATACA        |
| SCN1A02     | SCN1A   | CTGGCACATGCATGATTTTT       | CTGGTGGTGGTTCCATTCT         |
| SCN1A03     | SCN1A   | CCTGCATCTCTAACCACACC       | ACCATTGCTTTCTCTTCCA         |
| SCN1A04     | SCN1A   | TGCTTCTGAAATGGGTAGCAT      | CATCTGGCAGTTTCATTGTC        |
| SCN1A06     | SCN1A   | TCAAGAAAAGTGCTTGAACAGC     | TTAGACGCAGGATTTCGACCT       |
| SCN1AEx9    | SCN1A   | GACGCAGGTCAATGTCCAGA       | CCACCTCTTACGCTGGGATC        |
| SCN1AEx1620 | SCN1A   | TTCAGTAGTGAGTCTGATTTCG     | TGCTCTCAGTGCCTAAGGGA        |
| SCN1AEx26   | SCN1A   | TTGTATCCCCACCTTGTTTC       | AATCCCAACCGAAGGATTG         |
| SCN1AS1     | SCN1A   | GGAGCAATCCATCCATCAT        | TGACACCAATAAATAGATTTCAGGGTA |
| SCN2A01     | SCN2A   | ACAAAAGGCTTTGGATGAAATC     | TAGATGCATTTAGTTTCTCTTTGCTT  |
| SCN2A02     | SCN2A   | GCAGTGAGTCAGATCTGGAAGA     | TGTCTTGACCTCCAAACTTCTTT     |
| SCN2A03     | SCN2A   | TCATCATAGATAACTTCAATCAGCAA | TTAGACGCAGGATTTCGACCT       |
| SCN2A05     | SCN2A   | GCCTCTTTGGATCCTCCTCT       | CACCTAAAGGCTCGCTGAAT        |
| SCN2A26     | SCN2A   | TGTGTCCCCTACCTTGTTCC       | AATCCCAACTGAAGGATTGC        |
| SCN2AS1     | SCN2A   | ATAGGAAGCAGCGTGAAAA        | ACTTGAATTTCCGGATGCAG        |
| SCN2AS2     | SCN2A   | TGTGGGACTTGCTACCTCT        | TTTGCTGGCCTTGGTATAGG        |
| SCN2AS3     | SCN2A   | GCCTCCAGATTGTGATCCTG       | AGGTCCATCGCAATAAGCTG        |
| SCN3A01     | SCN3A   | TGGTCAGTTTAGTAGCCAATGC     | GCAACTGAAGCAGAGCAAG         |
| SCN3A02     | SCN3A   | CCGATGGAAAAACGTGAAAG       | TGTCAAAGGCTTGTGTTGGTT       |
| SCN3A03     | SCN3A   | TTTTATGACAGAGGAACAGAAAA    | TTAGACGCAGGATTTCGACCT       |
| SCN3A04     | SCN3A   | CTAGCGCCATCCTAAACAG        | TTCTTCGCTTTCTCCCAAGA        |
| SCN3A05     | SCN3A   | TTCAGCTAATTTCAATGGACCT     | TCTCTGTTTTGCCCTTTTTCA       |
| SCN3A07     | SCN3A   | AGTTCCTCGACCACCTCTCC       | CAAATGTGGCTGCTGAAGAA        |
| SCN3AEx1620 | SCN3A   | TTTAGCAGTGAATCTGAGCTG      | TGCTCTTAGTGTTTCGAAGTGA      |
| SCN3AEx26   | SCN3A   | GGAATGTTCTCGCAGAGAT        | GAAGGATTGCCACAGTCTCC        |
| SCN3AS1     | SCN3A   | ACCACAAAAGCCGATACCAA       | TTAGACGCAGGATTTCGACCT       |
| SCN3AS2     | SCN3A   | CTTTCCGATTTTGCTGCTTC       | GTAGGACCTCGCCATCTCTG        |
| SCN3AS3     | SCN3A   | CAGCCTTTGAAGGGGATGTA       | AGCAGCAATGTCGTTCTTT         |



**Table S6.** Primer pairs used on *Th. sirtalis* genomic DNA to assess interpopulation variation.

| <b>Name</b> | <b>Paralog</b> | <b>Forward primer</b>    | <b>Reverse primer</b>  |
|-------------|----------------|--------------------------|------------------------|
| SCN8A22     | <i>SCN8A</i>   | CCTCTGCCTTTGAGGTGAGTGGC  | ACCCACTTGCCTTGTTTGGGCT |
| SCN8A26     | <i>SCN8A</i>   | CCGCCTGGCCCGTATTGGTC     | ACTGGGTAGCGTCGGGGTCA   |
| SCN9A22     | <i>SCN9A</i>   | TCTGTTAATGGAACAGCGTCTGCC | TGGGGCTCTCCCCAACATGGA  |
| SCN9A26     | <i>SCN9A</i>   | AGGGGGATAGAGCCAATTTTCGGA | TCCAACCGAAGGATTGCCACA  |

Toxin Resistance Evolution in Garter Snakes

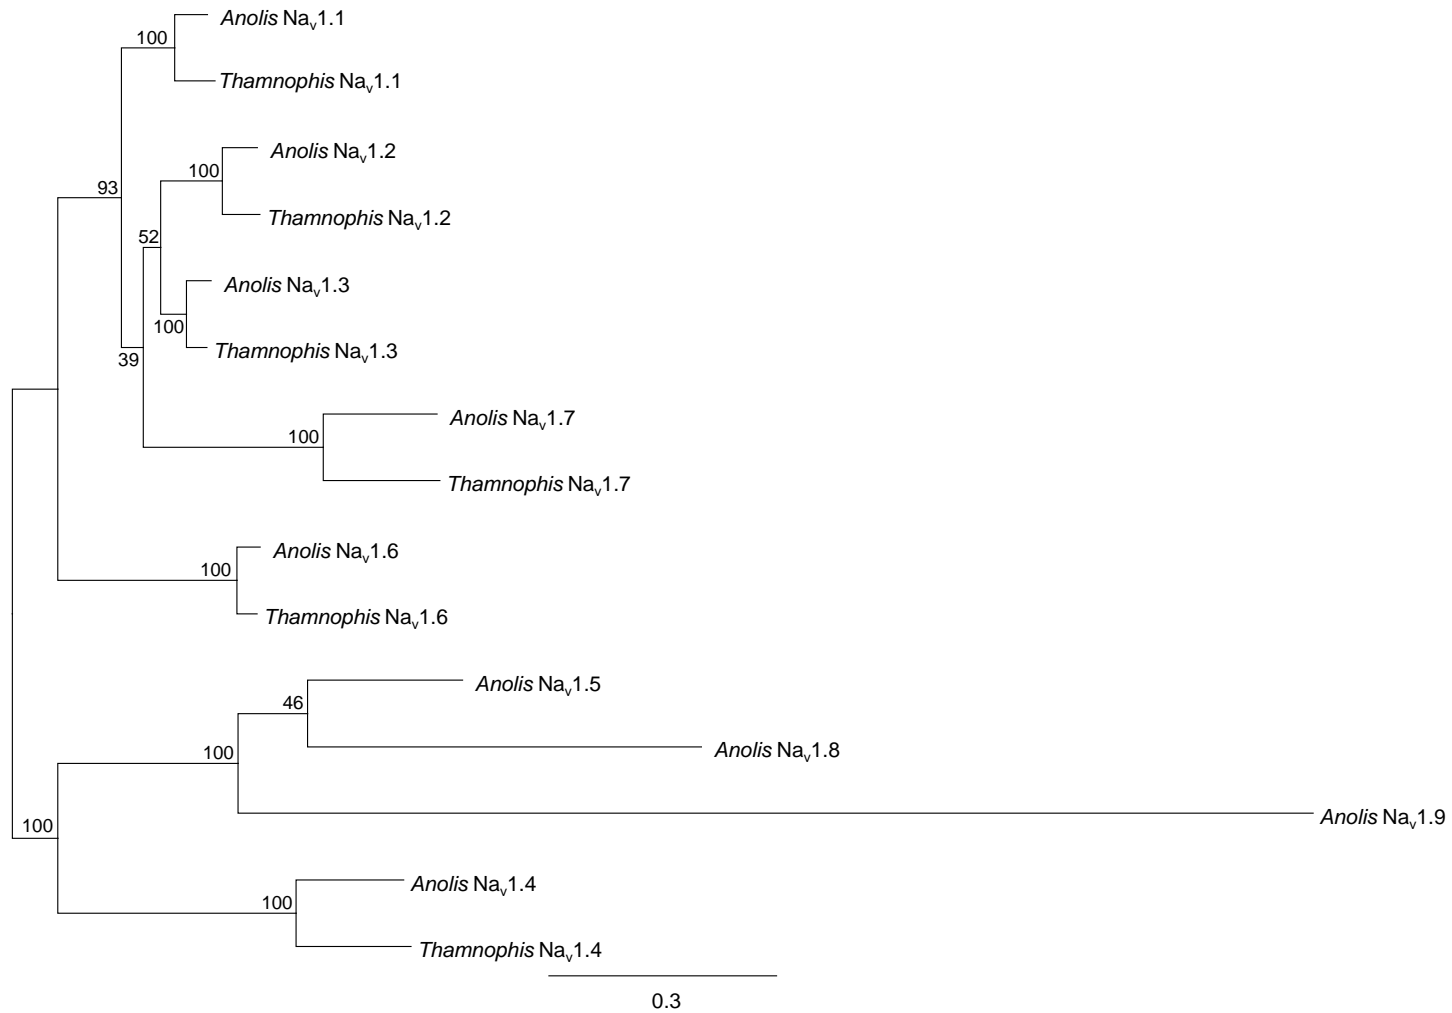

**Fig. S1.** Maximum likelihood phylogeny of *Anolis carolinensis* (Zakon et al. 2011, accession nos. BK007953-BK007961) and *Thamnophis sirtalis* Na<sub>v</sub>1 paralogs constructed using amino acid sequences in PhyML (Guindon and Gascuel 2003). Bootstrap values from 100 replicates are given at each node. Tree was rooted based on the topology of the larger tree in Zakon et al. (2011).
